# Supplementary material for: High Mitochondrial DNA Stability in B-Cell Chronic Lymphocytic Leukemia
Source: PLoS One. 2009 Nov 18;4(11):e7902. doi: 10.1371/journal.pone.0007902 (PMC2775629; doi:10.1371/journal.pone.0007902)
Supplement: Data S2 — LR values for the identification of the common biological source for those pairs of tumor/non-tumor samples showing mtDNA instabilities. (0.02 MB XLS) [file pone.0007902.s002.xls]

## Sheet: Table S2
Table S2. LR values for the identification of the common biological source for those pairs of tumor/non-tumor samples showing mtDNA instabilities .
Cell type	Sample ID	LR
LG	2LG	2.03208e+17
LL	2LL
HG	9HG	1.28072e+15
HL	9HL
LG	15LG	1.03003e+16
LL	15LL
HG	21HG	5.61037e+14
HL	21HL
LG	24LG	1.55856e+15
LL	24LL
LG	25LG	4.28182e+15
LL	25LL
LG	27LG	1.92535e+16
LL	27LL
HG	30HG	2.65949e+19
HL	30HL
LG	37LG	3.76853e+15
LL	37LL
LG	44LG	2.4692e+13
LL	44LL
LG	52LG	5.39489e+20
LL	52LL
LG	57LG	4.41222e+19
LL	57LL
LG	81LG	4.91177e+14
LL	81LL
LG	120LG	2.80917e+14
LL	120LL
LG	138LG	6.83468e+14
LL	138LL
	n.d.: non determine
	N/N indicates that the genotype could not be determined unambiguously
	LR: likelihood ratio
